# Supplementary material
Source: PubMed Central journal article supplement (PMC5358012)
Supplement: NIHMS848821-supplement-Suppl_.pdf [file NIHMS848821-supplement-Suppl_.pdf]

# **Evaluation of a Carbonic Anhydrase IX-Targeted Near-Infrared Dye for Fluorescence-Guided Surgery of Hypoxic Tumors**

## **Supporting Information**

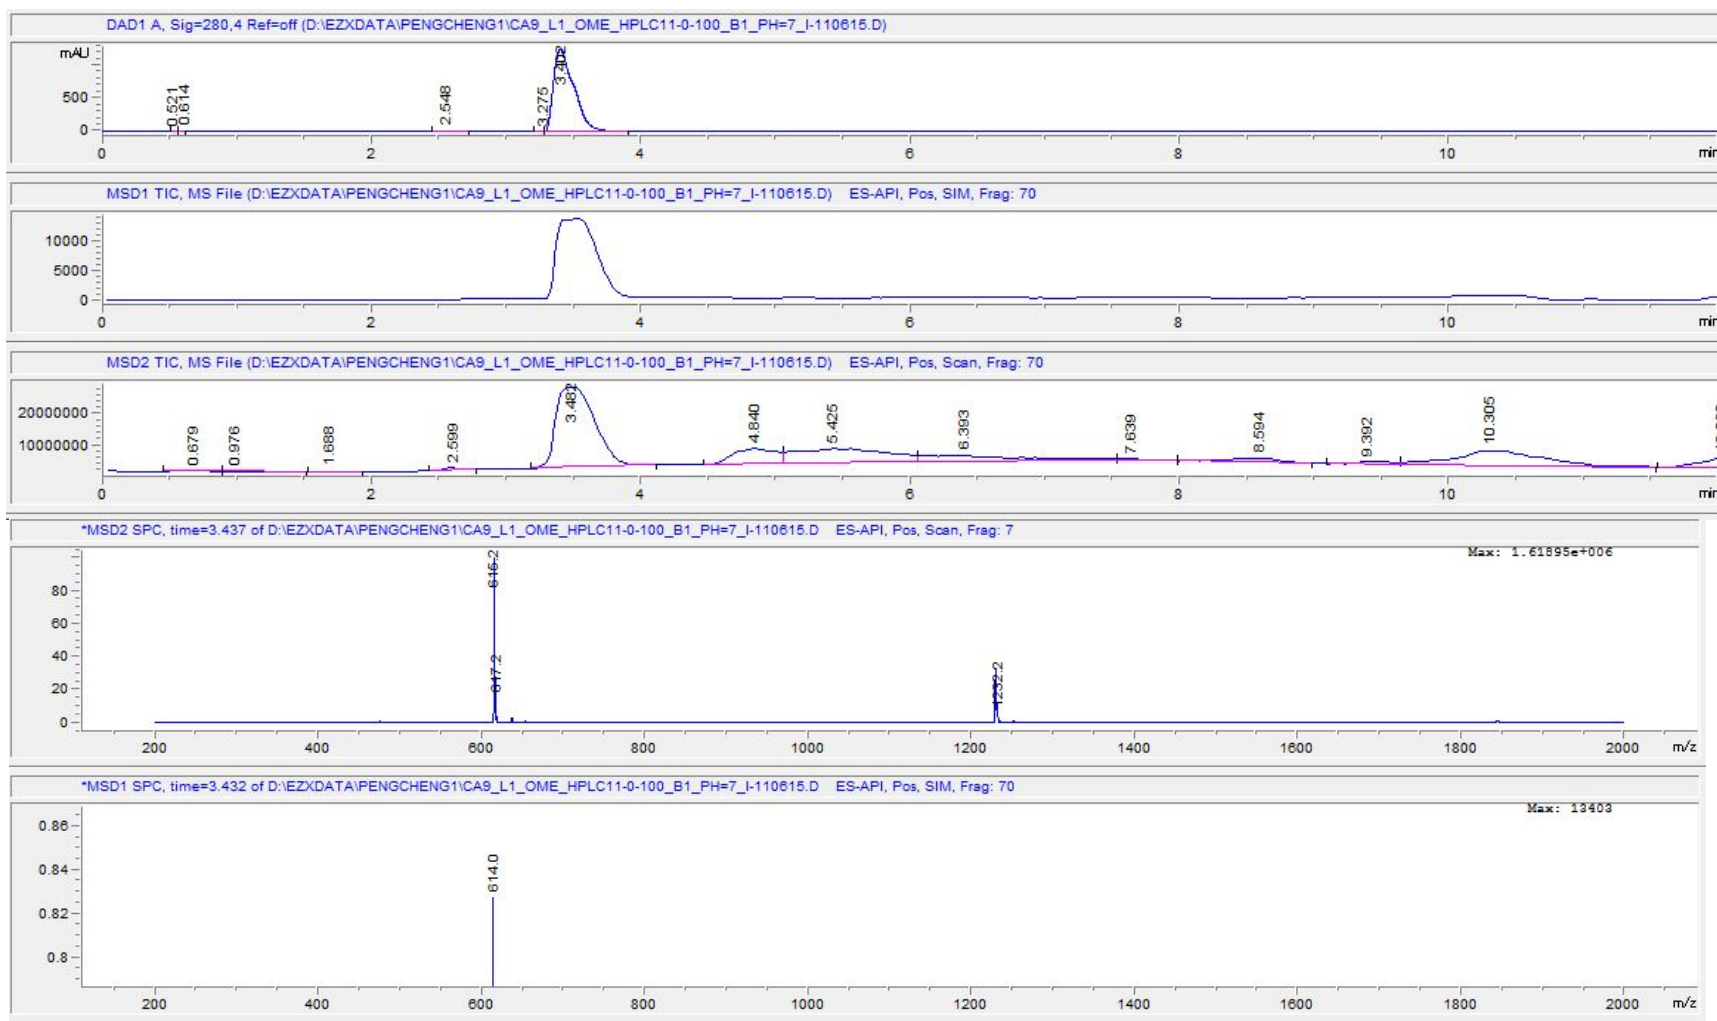

Chemical formula:  $C_{22}H_{28}N_6O_{10}S_2$   
 Exact Mass: 600.13  
 Molecular Weight: 600.62

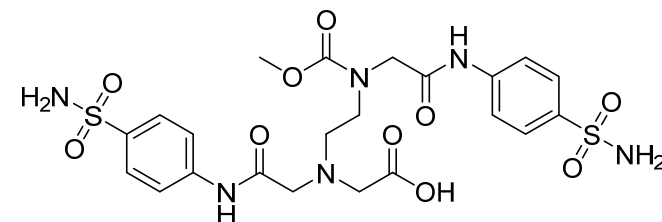

SI Figure 1. LC-MS characterization of methylated CA IX inhibitor.

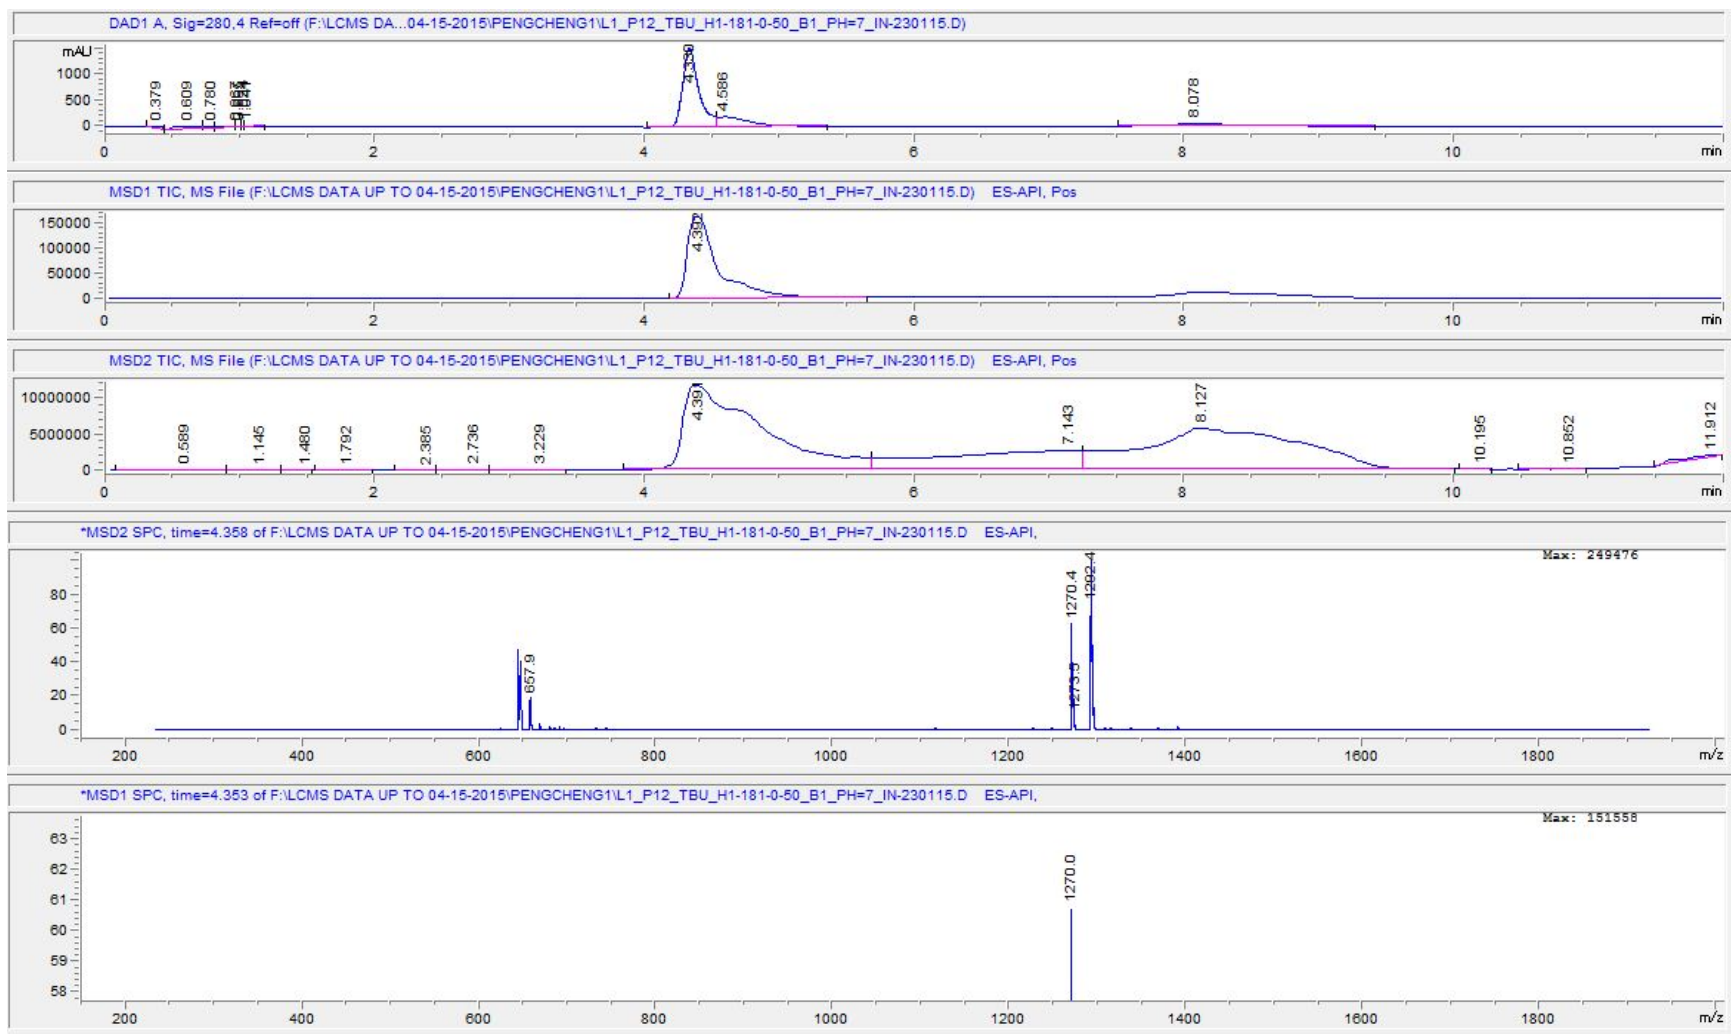

Chemical formula:  $C_{53}H_{89}N_7O_{22}S_2$   
 Exact Mass: 1239.55  
 Molecular Weight: 1240.44

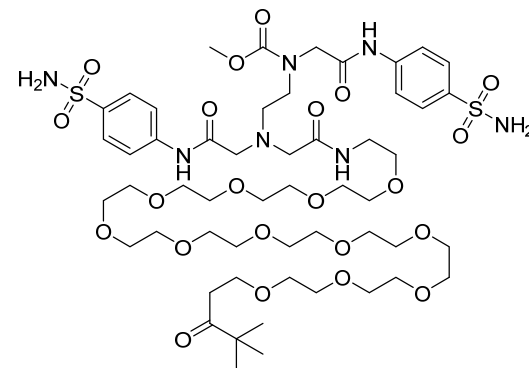

SI Figure 2. LC-MS characterization of protected PEGylated CA IX inhibitor.

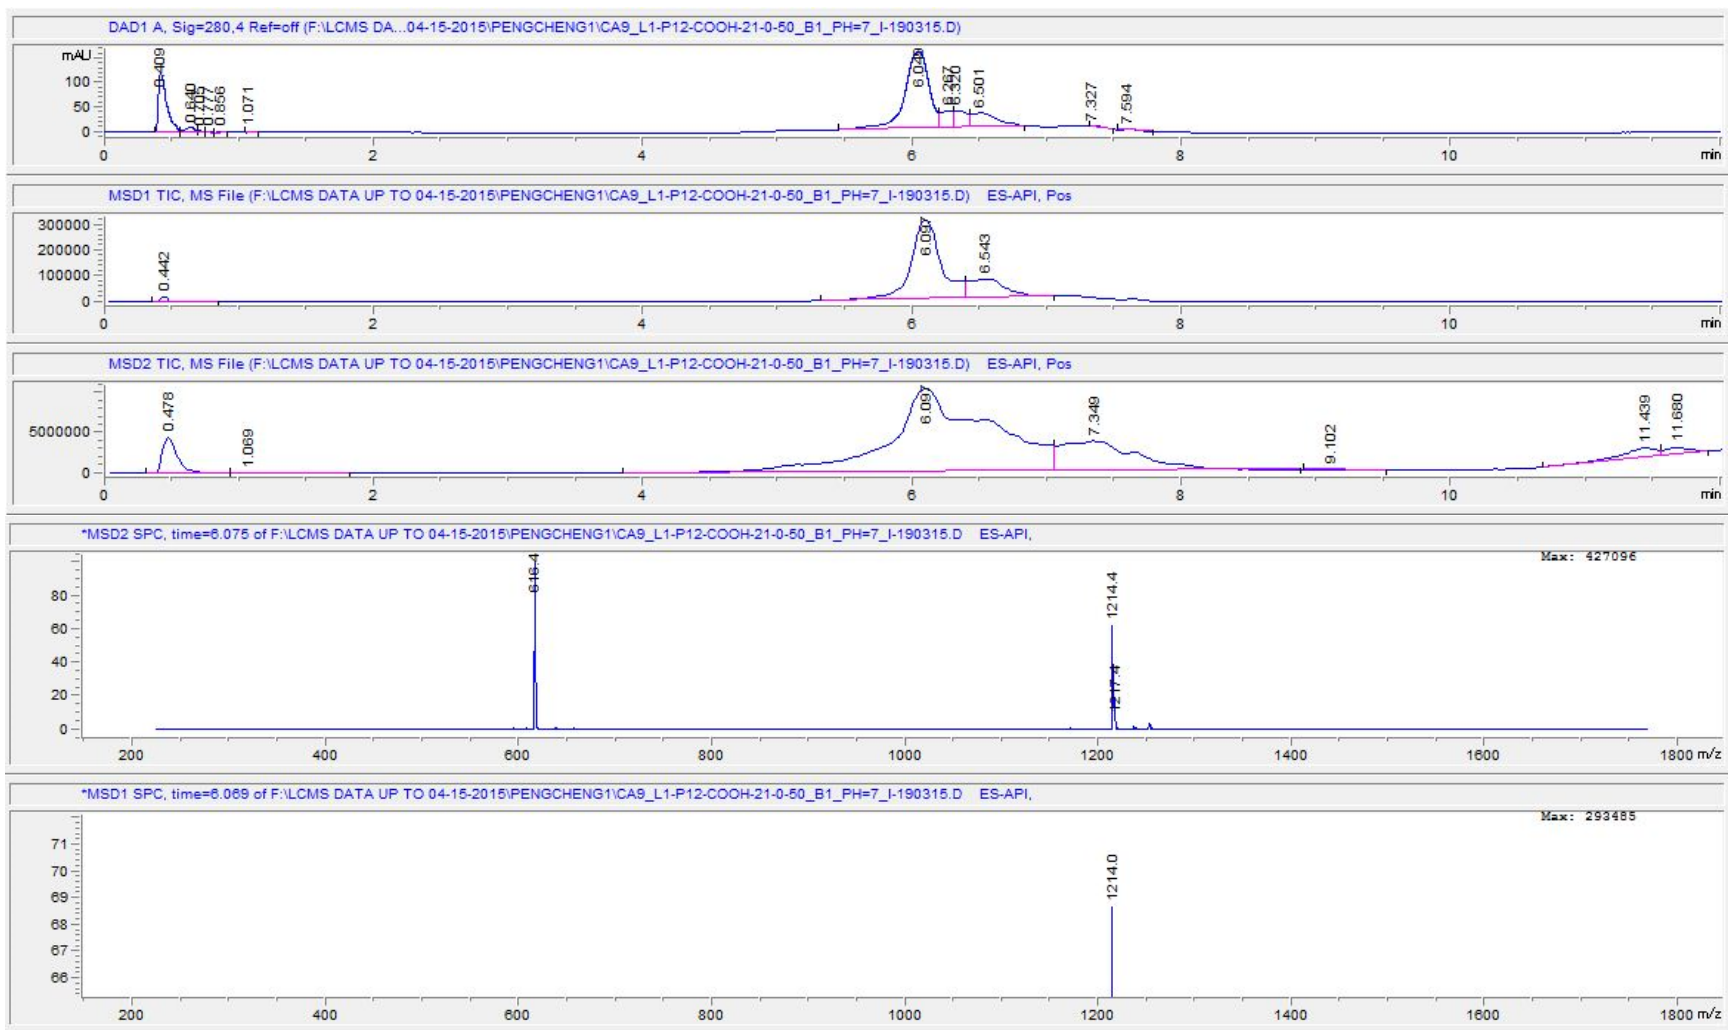

Chemical formula:  $C_{49}H_{81}N_7O_{23}S_2$   
 Exact Mass: 1199.48  
 Molecular Weight: 1200.33

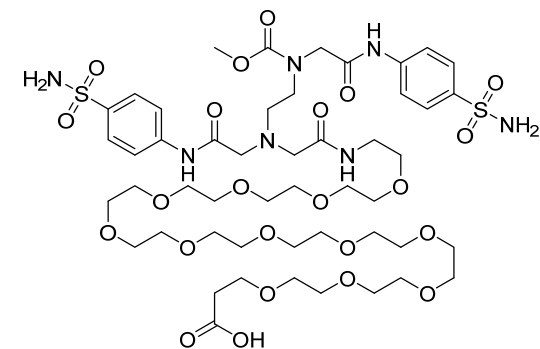

SI Figure 3. LC-MS characterization of deprotected PEGylated CA IX inhibitor.

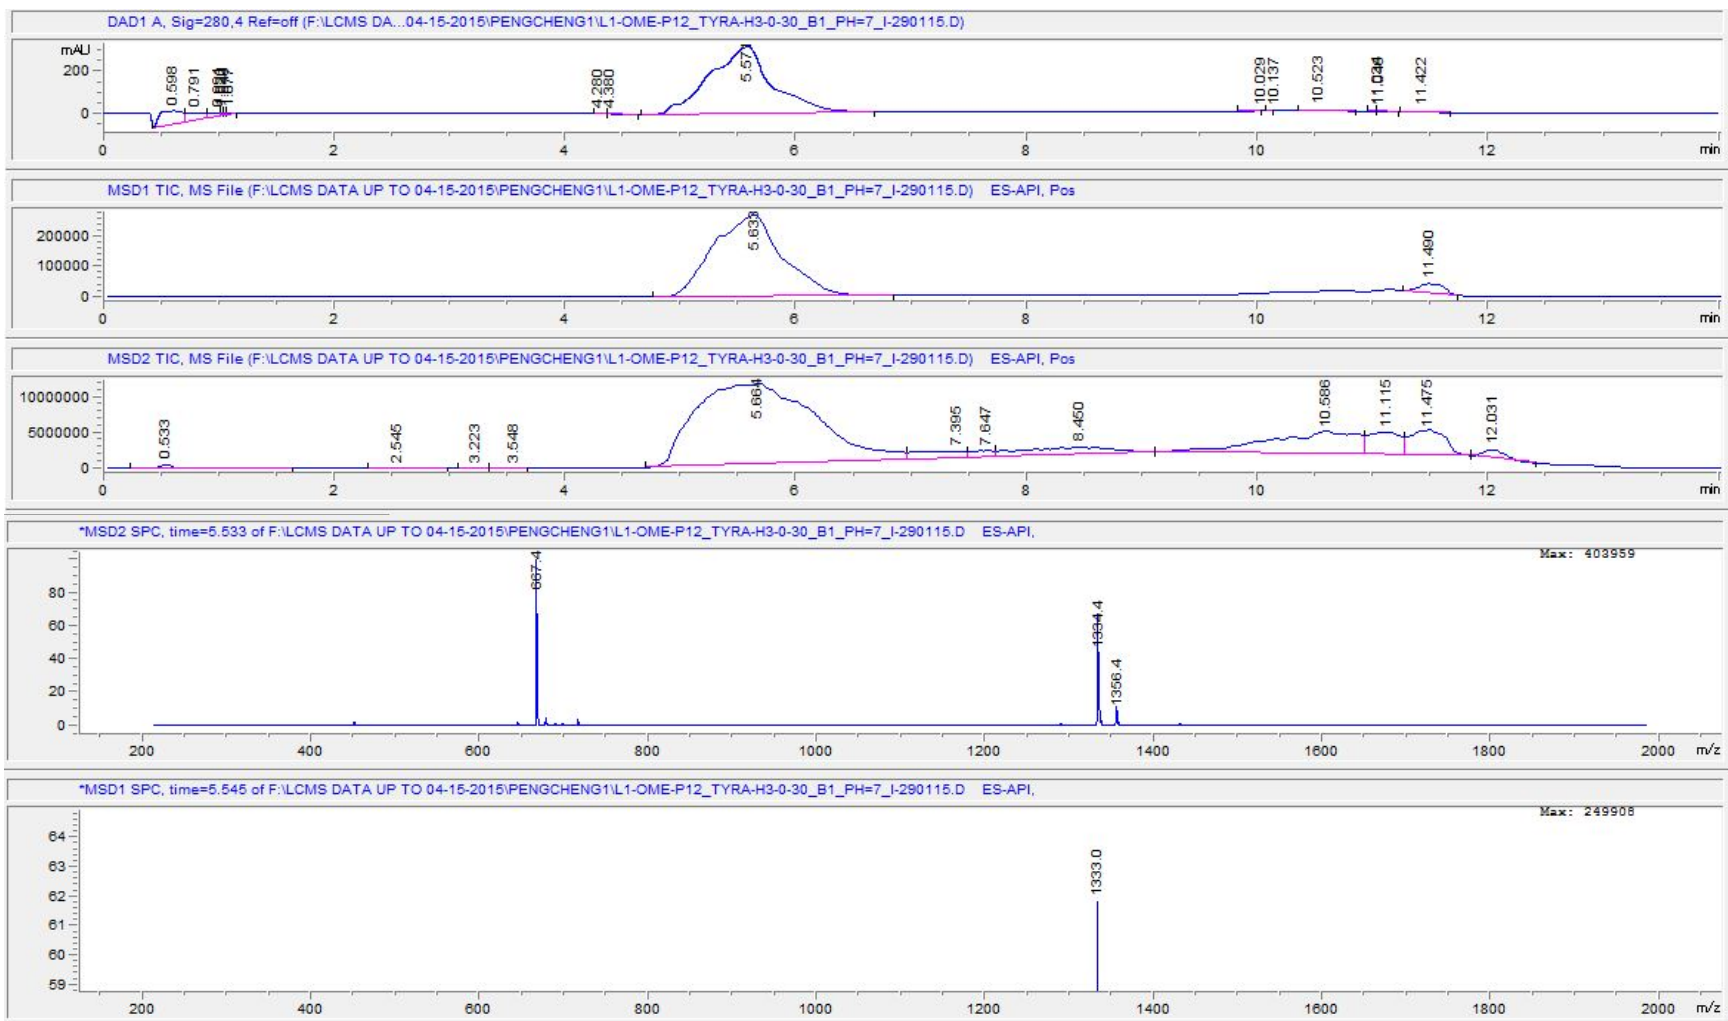

Chemical formula:  $C_{57}H_{90}N_8O_{23}S_2$   
 Exact Mass: 1318.56  
 Molecular Weight: 1319.50

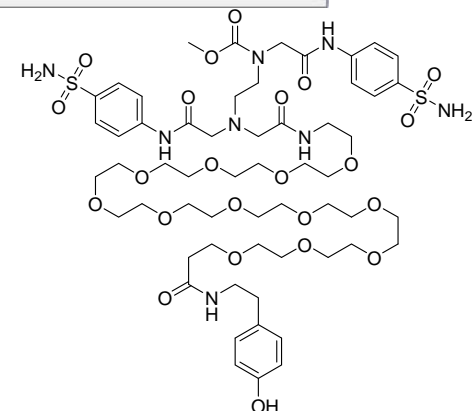

SI Figure 4. LC-MS characterization of tyramine-PEG-CA IX inhibitor.

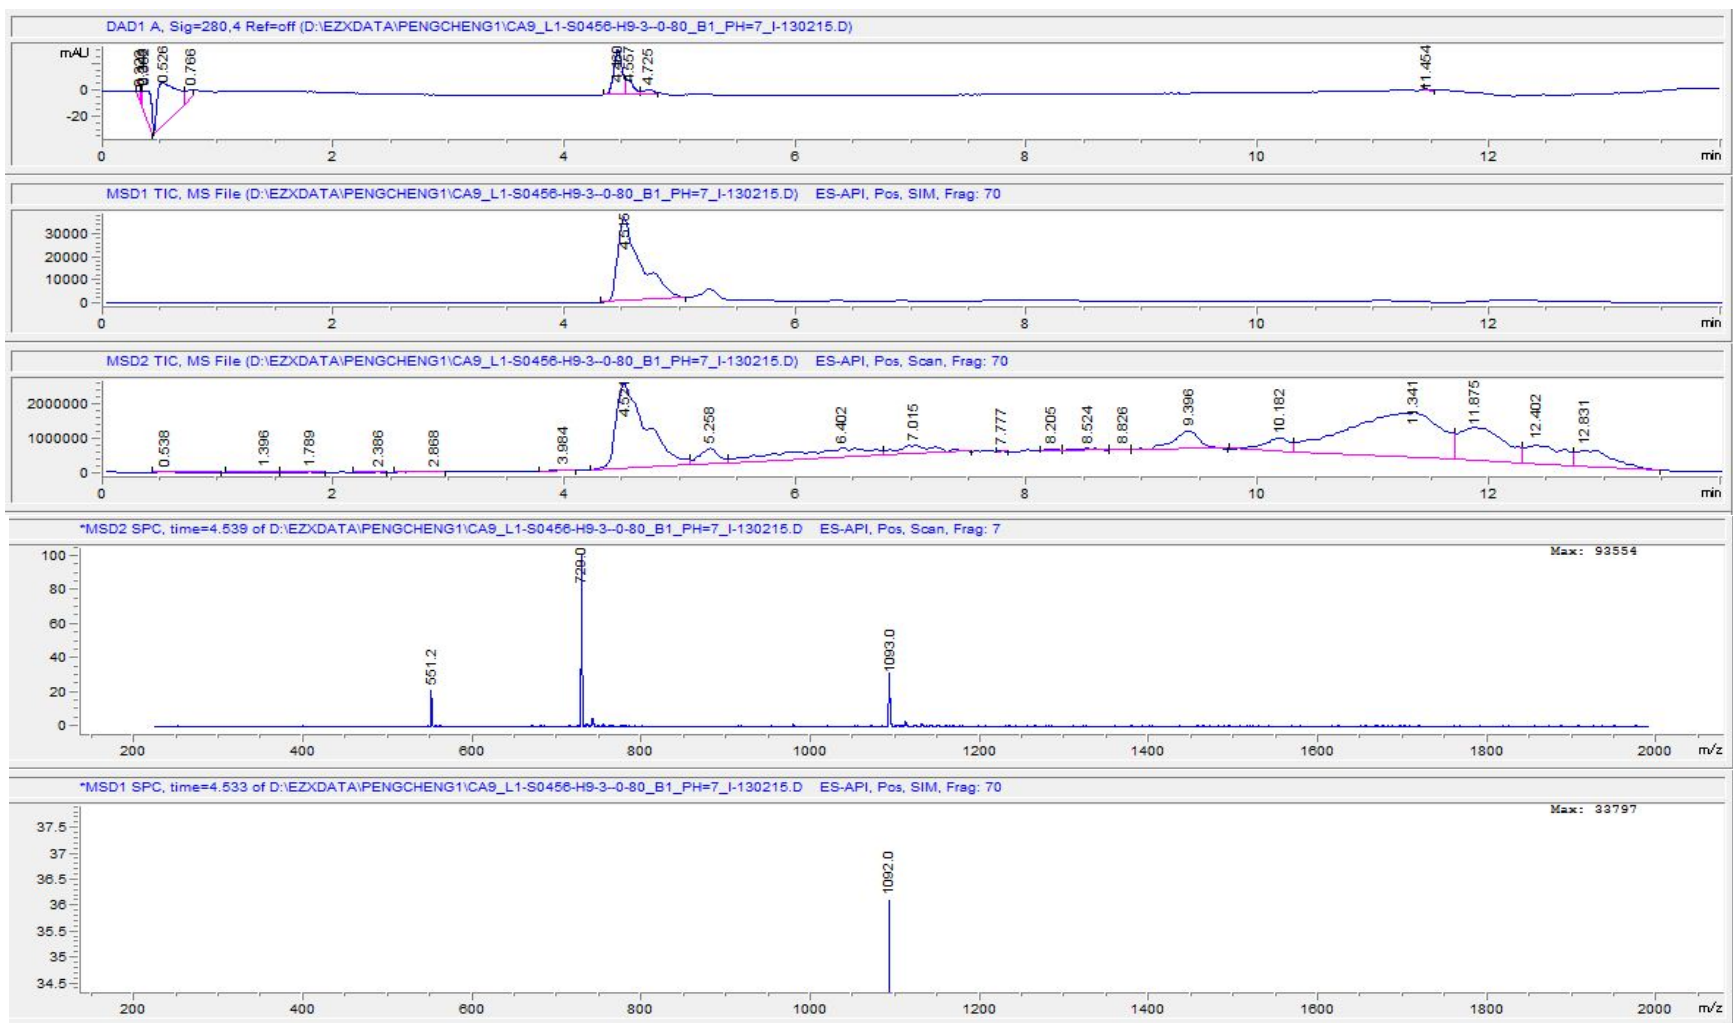

Chemical formula:  $C_{95}H_{137}N_{10}O_{35}S_6^+$   
 Exact Mass: 2169.76  
 Molecular Weight: 2171.54

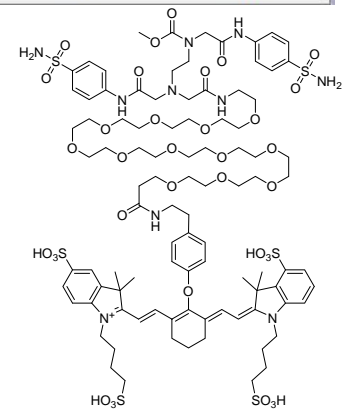

SI Figure 5. LC-MS characterization of Hypoxyfluor.

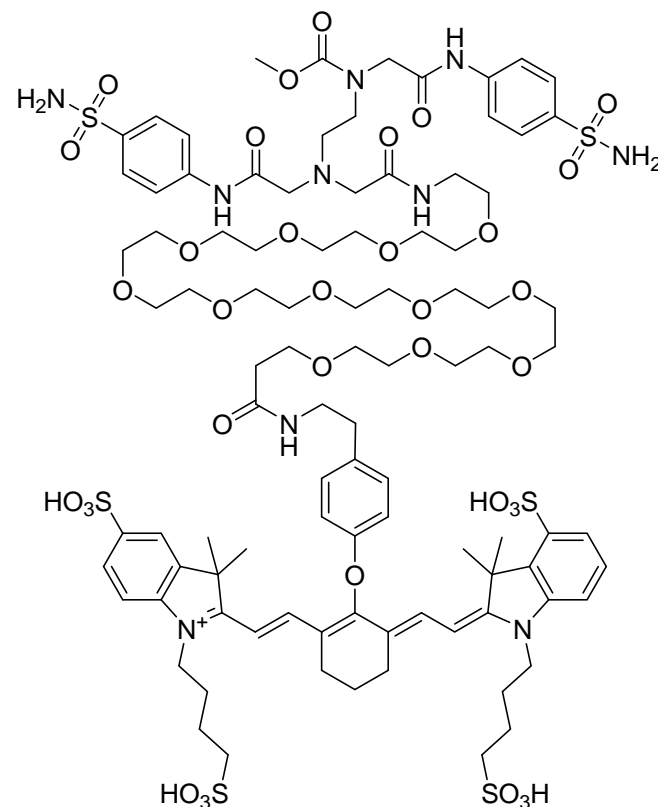

### Hypoxyfluor physical properties:

Chemical formula  $C_{95}H_{137}N_{10}O_{35}S_6^+$

Exact Mass: 2169.76

Molecular Weight: 2171.54

Elemental Analysis: 52.55% C, 6.36% H, 6.45% N, 25.79% O, 8.86% S

Physical appearance: Green colored solid

Water solubility: highly water soluble

Stability: stable for >3 months when protected from light at 0 °C

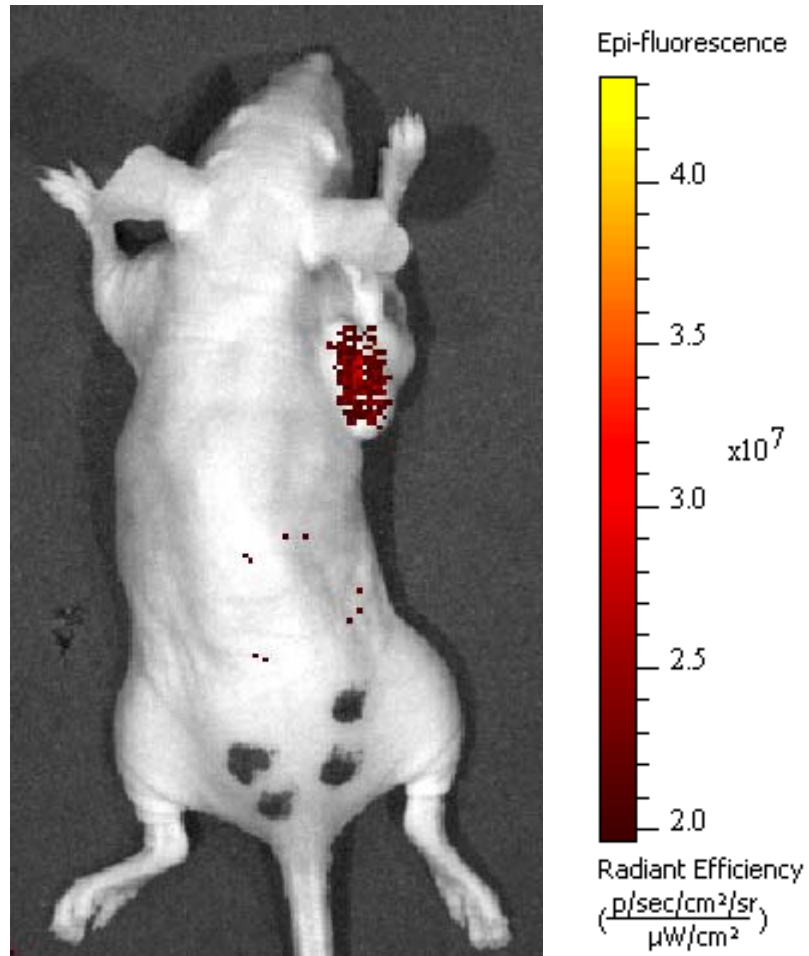

SI Figure 7. Representative images of Hypoxyfluor treated HT-29 tumor bearing mice. Mice bearing HT-29 tumors were injected via tail vein with 13 nmol Hypoxyfluor. Fluorescence images were acquired 8 hours post injection.
